# 1 Modulation of tonotopic ventral MGB is 2 behaviorally relevant for speech 3 recognition.

---

4 *Paul Glad Mihai*<sup>1,2</sup>, *Michelle Moerel*<sup>3,4,5</sup>, *Federico de Martino*<sup>3,4,6</sup>, *Robert Trampel*<sup>1</sup>, *Stefan Kiebel*<sup>2</sup>,  
5 *Katharina von Kriegstein*<sup>1,2</sup>

6 <sup>1</sup> *Max Planck Institute for Human Cognitive and Brain Sciences, Leipzig, Germany*

7 <sup>2</sup> *Chair of Cognitive and Clinical Neuroscience, Faculty of Psychology, Technische Universität Dresden,*  
8 *01187 Dresden, Germany*

9 <sup>3</sup> *Department of Cognitive Neuroscience, Faculty of Psychology and Neuroscience, Maastricht University,*  
10 *Maastricht, the Netherlands*

11 <sup>4</sup> *Maastricht Brain Imaging Center (MBIC), Maastricht, the Netherlands*

12 <sup>5</sup> *Maastricht Centre for Systems Biology (MaCSBio), Maastricht University, the Netherlands*

13 <sup>6</sup> *Center for Magnetic Resonance Research, University of Minnesota, Minneapolis, USA*

## 14 ***Abstract***

15 Sensory thalami are central sensory pathway stations for information processing. Their role for human  
16 cognition and perception, however, remains unclear. Recent evidence suggests a specific involvement of  
17 the sensory thalami in speech recognition. In particular, the auditory thalamus (medial geniculate body,  
18 MGB) response is modulated by speech recognition tasks and the amount of this task-dependent  
19 modulation is associated with speech recognition abilities. Here we tested the specific hypothesis that  
20 this behaviorally relevant modulation is present in the MGB subsection that corresponds to the primary  
21 auditory pathway (i.e., the ventral MGB [vMGB]). We used ultra-high field 7T fMRI to identify the vMGB,  
22 and found a significant positive correlation between the amount of task-dependent modulation and the  
23 speech recognition performance across participants within left vMGB, but not within the other MGB  
24 subsections. These results imply that modulation of thalamic driving input to the auditory cortex  
25 facilitates speech recognition.

## 26 **Introduction**

27 Human communication relies on fast and accurate decoding of speech—the most important tool  
28 available to us for exchanging information. Understanding the neural decoding mechanisms for speech  
29 recognition is important for understanding human brain function (Rauschecker and Scott, 2009), but  
30 also for understanding communication disorders such as developmental dyslexia (Galaburda et al., 1994,  
31 Müller-Axt et al., 2017). Since the early findings of Wernicke (Wernicke, 1874) neuroscientific models of  
32 speech recognition have mainly focused on cerebral cortex mechanisms (Hickok and Poeppel, 2007,  
33 Friederici and Gierhan, 2013). Yet, more recently it has been suggested that a full understanding of  
34 speech recognition mechanisms might need to take the subcortical sensory pathways – particularly the  
35 sensory thalami – into account (Kriegstein et al., 2008, Díaz et al., 2012, Díaz et al., 2018,  
36 Chandrasekaran et al., 2009, Chandrasekaran et al., 2011).

37 The text book view of the sensory thalamus is still that of a passive relay station (Squire et al., 2012),  
38 although it is well known that there are strong corticofugal projections to the sensory thalamus  
39 (Sherman and Guillery, 2006, Winer and Prieto, Lee and Sherman, 2012, Lee and Winer, 2011).  
40 Furthermore, over the last two decades, experimental evidence in humans and other mammals in the  
41 visual as well as the auditory modality has shown that sensory thalamus responses are modulated by  
42 attention (Saalman and Kastner, 2011), percept (Haynes et al., 2005), context (Antunes and Malmierca,  
43 2011, McAlonan et al., 2008, O'Connor et al., 2002), and task (Díaz et al., 2012, von Kriegstein et al.,  
44 2008, Díaz et al., 2018). Based on these findings, the sensory thalamus has become accepted as a  
45 structure that is modulated by cognitive demands and is more involved in active information regulation  
46 than the text book view implies (Saalman and Kastner, 2011, Haynes et al., 2005, Antunes and  
47 Malmierca, 2011, McAlonan et al., 2008, O'Connor et al., 2002, Díaz et al., 2012, von Kriegstein et al.,  
48 2008, for a different take see Camarillo et al., 2012).

49 In the case of speech, previous studies showed a task-dependent modulation in the auditory sensory  
50 thalamus for auditory speech recognition, (MGB; von Kriegstein et al., 2008, Díaz et al., 2012) as well as  
51 a task-dependent modulation in the visual sensory thalamus for visual speech recognition (LGN; Díaz et  
52 al., 2018). Specifically, the MGB showed significantly higher responses to an auditory speech recognition  
53 task than to control tasks, independent of attentional load (von Kriegstein et al., 2008, Díaz et al., 2012).  
54 The performance level in the auditory speech recognition task was significantly correlated with the task-  
55 dependent modulation in the MGB of the left hemisphere (von Kriegstein et al., 2008).

56 Following the Bayesian brain hypothesis, (Knill and Pouget, 2004, Friston and Kiebel, 2009, Friston, 2005,  
57 Kiebel et al., 2008) and based on findings in non-human animals (Krupa et al., 1999, Sillito et al., 1994,  
58 Wang et al.), one possible explanation for the MGB task-dependent modulation for speech is that  
59 cerebral cortex areas tune the sensory thalamus depending on behavioral demand, and that this tuning  
60 is particularly relevant for fast-varying and predictable stimuli such as speech (von Kriegstein et al.,  
61 2008, Díaz et al., 2012). This view entails that the task-dependent modulation occurs already in those  
62 parts of the MGB that drive the cerebral cortex representations (von Kriegstein et al., 2008) – the so-  
63 called first-order sensory thalamus (Sherman and Guillery, 1998).

64 The MGB consists of three divisions. Only the ventral MGB (vMGB) can be considered first-order sensory  
65 thalamus (Malmierca et al., 2015 [review] , Winer et al., 2005 [review] ), as vMGB receives driving inputs  
66 from sources that relay information from the sensory periphery and projects this information to the  
67 cerebral cortex (Sherman and Guillery, 1998). Ventral MGB also receives modulatory input from cerebral  
68 cortex (Sherman and Guillery, 1998). In contrast, the other two MGB divisions, the dorsal (dMGB) and  
69 medial MGB (mMGB), do not show major projections to primary auditory cortices (Vasquez-Lopez et al.,  
70 2017, Anderson et al., 2007b, Mothe et al., 2006), and are not considered to be part of the first order  
71 (i.e., lemniscal) auditory pathway (Anderson et al., 2007a, Anderson et al., 2009, Calford, 1983,  
72 Cruikshank et al., 2001, Gonzalez-Lima and Cada, 1994, Hackett et al., 1998, Morest, 1964, Winer et al.,  
73 1999); although see (Anderson and Linden, 2011).

74 The goal of the present study was to test whether the behaviorally relevant task-dependent modulation  
75 for speech is located in the first-order auditory thalamus; i.e., the vMGB (von Kriegstein et al., 2008). A  
76 localization of behaviorally relevant task-dependent modulation for speech to the vMGB would provide  
77 a crucial step forward in understanding sensory thalamus function for human cognition in vivo, as it  
78 would imply that the stimulus representation in the auditory sensory pathway is modulated when  
79 humans recognize speech.

80 Due to the relatively small size of human MGB (ca. 5×4×5 mm, Winer, 1984) and the spatial limitations  
81 of non-invasive imaging techniques, it was so far not possible to differentiate between the three major  
82 MGB divisions in order to test localization of this task-dependent modulation to the lemniscal part of the  
83 MGB. Here we therefore used ultra-high field functional magnetic resonance imaging (fMRI) at 7 Tesla,  
84 enabling high spatial resolution measurements (Duyn, 2012). The vMGB has a strong tonotopic  
85 organization (Calford, 1983, Rodrigues-Dageaef et al., 1989, Anderson et al., 2007a) while the other two  
86 MGB subsections have only a weak tonotopic organization (i.e., broadly tuned neurons, Anderson and

87 Linden, 2011, Calford, 1983, Bartlett and Wang, 2011, Rodrigues-Dagaeff et al., 1989, Ohga et al., 2018).  
88 We planned to distinguish the vMGB based on its tonotopic organization as well as its topographic (i.e.,  
89 ventral) location.

90 We employed three fMRI paradigms – an MGB localizer, a tonotopy localizer, and the speech  
91 experiment. In the MGB localizer and the tonotopy localizer (Figure 1A), participants listened to natural  
92 sounds (human voices, animal cries, tool sounds) (Moerel et al., 2015). While the MGB localizer  
93 identified the left and right MGB, the tonotopic maps resulting from the tonotopy localizer were used to  
94 localize the left and right vMGB that served as regions of interest for hypotheses testing in the speech  
95 experiment. In the speech experiment (Figure 1 B & C), participants listened to blocks of auditory  
96 syllables (e.g., /aba/), and performed either a speech or a speaker task. In the speech task, participants  
97 reported via button press whether the current syllable was different from the previous one (1-back  
98 task). In the speaker task, participants reported via button press whether the current speaker was  
99 different from the previous one.

## A. MRI sequence acquisition of MGB and tonotopy localizer

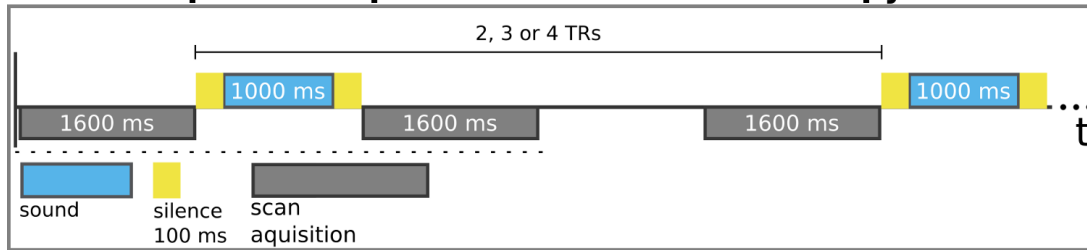

## B. MRI sequence acquisition of speech experiment

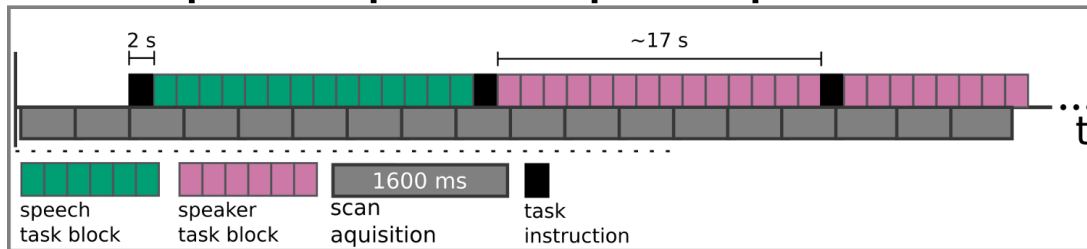

## C. Design and trial structure of speech experiment

### Vowel Change

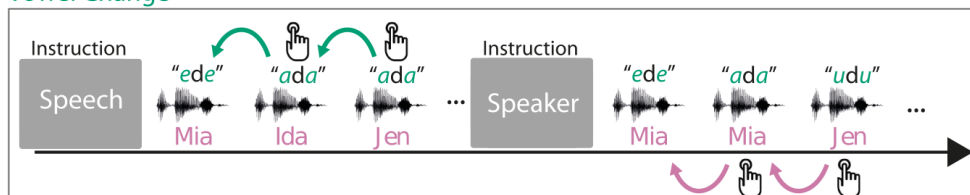

### Consonant Change

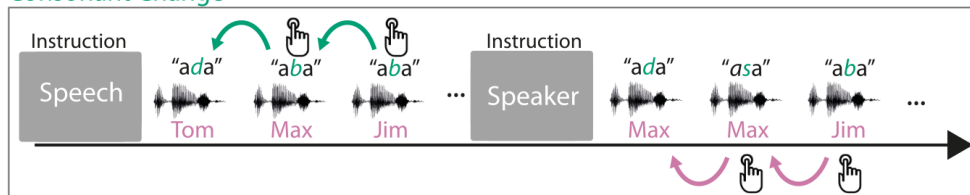

- One-back speech task: same/different vowel/consonant?
- One-back speaker task: same/different speaker?

100

101 **Figure 1. A.** MRI sequence acquisition of MGB and tonotopy localizer. Stimuli ('sound') were presented in silence  
 102 periods between scan acquisitions and jittered with 2, 3, or 4 TRs. TR: repetition time of volume acquisition. **B.** MRI  
 103 sequence acquisition of the speech experiment. Each green or magenta rectangle of a block symbolizes a syllable  
 104 presentation. Blocks had an average length of 17 s. Task instructions ('speech', 'speaker') were presented for 2 s  
 105 before each block. MRI data were acquired continuously ('scan acquisition') with a TR of 1600 ms. **C.** Design and  
 106 trial structure of speech experiment In the speech task, listeners performed a one-back syllable task. They pressed  
 107 a button whenever there was a change in syllable in contrast to the immediately preceding one, independent of  
 108 speaker change. The speaker task used exactly the same stimulus material and trial structure. The task was,  
 109 however, to press a button when there was a change in speaker identity in contrast to the immediately preceding  
 110 one, independent of syllable change. Syllables differed either in vowels or in consonants within one block of trials.  
 111 An initial task instruction screen informed participants about which task to perform.

112

113 In previous studies we found the task-dependent modulation for speech (i.e., higher response in the  
114 speech in contrast to a control task on the same stimulus material) in both the left and right MGB and a  
115 correlation of the task-dependent modulation with speech recognition performance only in the left  
116 MGB (Kriegstein et al., 2008, Díaz et al., 2012). We therefore hypothesized (i) a higher response to the  
117 speech than to the control (speaker) task in the tonotopically organized left and right vMGB, and (ii) a  
118 positive correlation between speech recognition performance and the task-dependent modulation for  
119 speech in the tonotopically organized left vMGB.

## 120 **Results**

### 121 **Tonotopy localizer – replication of tonotopy in MGB**

122 First, we aimed to replicate the MGB tonotopy reported previously by Moerel et al. (2015) with a larger  
123 participant sample. Participants listened to natural sounds (human voices, animal cries, tool sounds) in a  
124 fast event-related scheme during silent gaps of the clustered imaging technique (Moerel et al., 2015).  
125 Using a model that mimics peripheral sound processing (Chi et al., 2005), each sound was represented  
126 as a spectrogram. The resulting spectrograms were averaged over time and divided into ten equal  
127 bandwidths in octaves. Onsets for each bin were convolved with the hemodynamic response function  
128 and entered into the general linear model. Each voxel within each participant's left and right MGB  
129 localizer mask was labeled according to the frequency bin to which it responded strongest, i.e., which  
130 had the highest parameter estimate (Moerel et al., 2015). Thus, voxels would have values from 1-10  
131 corresponding to the frequency bin that they best represented. This resulted in a map of frequency  
132 distributions from low to high frequencies in the left and right MGB for each participant.

133 Similar as in Moerel et al. (2015), we found two tonotopic gradients within the MGB in the group  
134 analysis. On visual inspection, one high frequency region in the middle of the MGB was flanked by  
135 gradually lower frequency components dorsally and ventrally (Figure 2A and B).

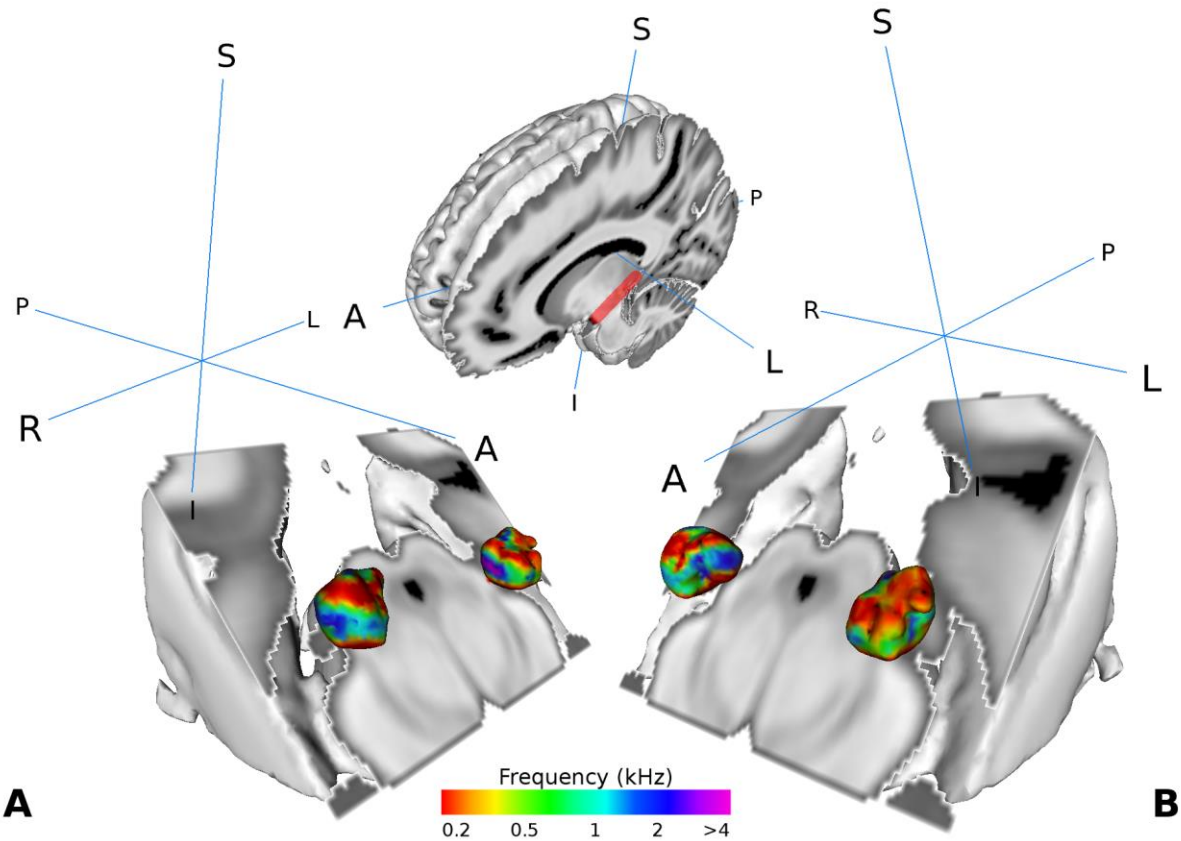

136

137 **Figure 2.** Visualization of the average tonotopy across participants ( $n = 28$ ) found in the MGB using the tonotopic  
138 localizer. The half-brain image at the top shows the orientation (A: anterior, P: posterior, L: left, R: right, S:  
139 superior, I: inferior), and a cut through the brain with a red line denoting the  $-45^\circ$  oblique plane used in the  
140 visualizations in panels A-B. **A.** Three dimensional representation of the tonotopy in the left and right MGB with  
141 two low-high frequency gradients. **B.** Same as in A with a different orientation. Crosshairs denote orientation.

142

143

144 The regions of low and high frequency preference could be observed in the sagittal view. To quantify the  
145 tonotopic gradient direction, we calculated gradient angles in ten slices of the left and right tonotopic  
146 map in sagittal orientation. Histograms of gradient angles in  $5^\circ$  steps were calculated for each slice. The  
147 histograms of the gradients were then averaged first over slices per participant, followed by an average  
148 over participants. The analysis of the mean gradient distributions across individuals (Figure 3, black line  
149 with standard error of the mean in grey) for the left MGB had maxima at  $130^\circ$  and  $300^\circ$  (dashed red  
150 lines, Figure 3). In the right MGB the mean across individual distributions had maxima at  $130^\circ$  and  $310^\circ$ .

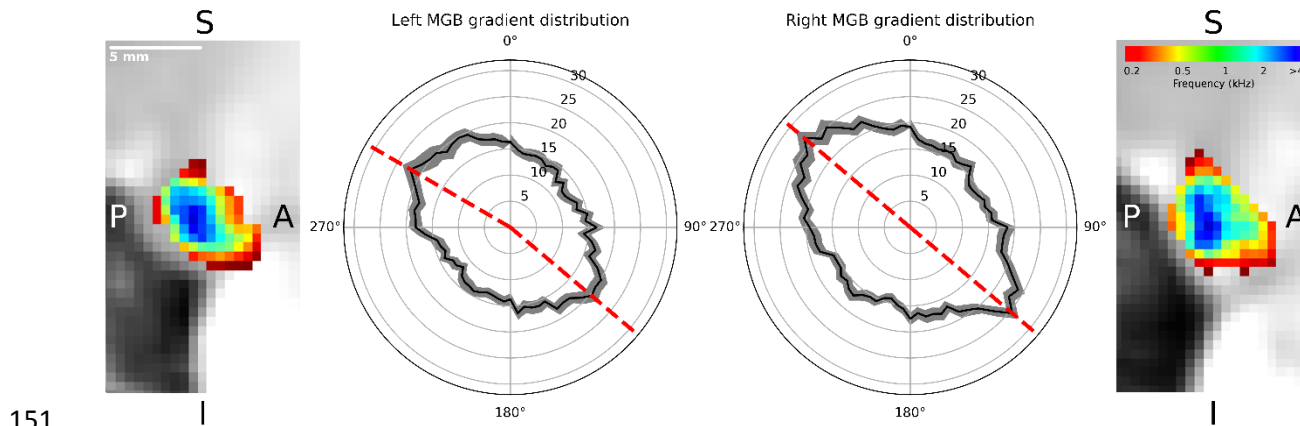

151  
152 **Figure 3.** Distribution of gradients in a sagittal plane for ten slices averaged over participants ( $n = 28$ ). The mean  
153 number of angle counts in  $5^\circ$  steps (black line with standard error of the mean in grey, numbers indicate counts)  
154 for the left MGB have maxima at  $130^\circ$  and  $300^\circ$  (red dashed lines). For the right MGB the maximum gradients are  
155 at  $130^\circ$  and  $310^\circ$  (red dashed lines). We interpreted these as two gradients in each MGB: one from anterior-ventral  
156 to the center ( $130^\circ$ ) and the other from the center to anterior-dorsal-lateral ( $300^\circ$ ,  $310^\circ$ ). The two outer images  
157 display a slice of the mean tonotopic map in the left and right MGB in sagittal view (S: superior, I: inferior, P:  
158 posterior, A: anterior).

159

160

### 161 **Tonotopy localizer - Localisation of vMGB**

162 We used the high frequency components in the middle as a reference to subdivide the MGB volume into  
163 two regions per side (Figure 4 A and B). For the left MGB, gradient 1 is located ventrally and slightly  
164 medial compared to gradient 2, which is situated more anterior, dorsal, and lateral. For the right MGB  
165 we find similar locations: gradient 1 is more ventral and medial compared to gradient 2. The center of  
166 mass (COM) and the volume for each region is summarized in Table 1. Based on the tonotopy and its  
167 ventral location (Morel et al., 1997, Bartlett and Wang, 2011) we considered gradient 1 to represent the  
168 vMGB (Moerel et al., 2015).



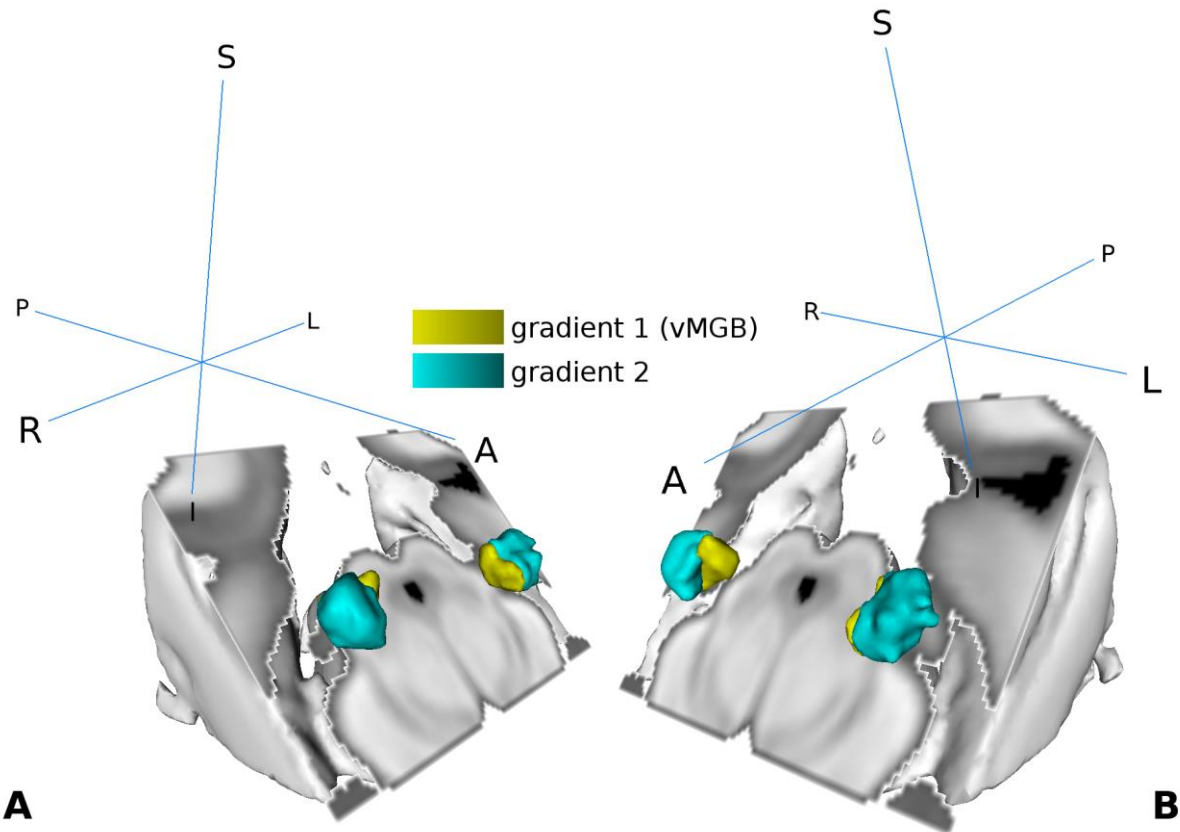

169

170 **Figure 4.** Visualization of the tonotopic gradients found in the MGB based on the tonotopic localizer (see Figure 2).  
 171 **A.** Three dimensional rendering of the two tonotopic gradients (yellow: ventro-medial gradient 1, interpreted as  
 172 vMGB, cyan: dorso-lateral gradient 2) in the left and right MGB. **B.** Same as in A with a different orientation.  
 173 Orientation is the same as in Figure 2; crosshairs denote orientation.

174

175 **Table 1.** Center of mass (COM) and volume of each MGB mask used in the analysis.

| Mask                                    | COM (MNI coordinates mm) | Volume (mm <sup>3</sup> ) |
|-----------------------------------------|--------------------------|---------------------------|
| <b>Left Gradient 1 (ventro-medial)</b>  | (-12.7, -26.9, -6.3)     | 37.38                     |
| <b>Left Gradient 2 (dorso-lateral)</b>  | (-14.8, -25.9, -5.4)     | 77.38                     |
| <b>Right Gradient 1 (ventro-medial)</b> | (12.7, -27.6, -4.4)      | 45.00                     |
| <b>Right Gradient 2 (dorso-lateral)</b> | (14.7, -25.8, -4.3)      | 67.38                     |

176

## 177 **Speech experiment**

### 178 **Behavioral**

179 Participants scored a mean hit rate in the speech task of 87.2% with 97% highest posterior density (HPD)  
180 interval [82.8%, 91.5%], and mean hit rate in the speaker task was 76.0% with a 97% HPD interval  
181 [70.6%, 81.0%]. The mean hit-rate was 11.2% higher in the speech task than in the speaker task with  
182 97% HPD interval [7.6%, 15.0%] (Supplementary Figure 1 A and B).

### 183 **fMRI**

184 We tested our hypothesis that within the ventral tonotopic gradient (i.e., vMGB) there is a task-  
185 dependent modulation. Unexpectedly, we did not observe such a task-dependent modulation, i.e., a  
186 higher BOLD responses in the speech task in comparison to the speaker task (*Speech vs Speaker*  
187 contrast) in vMGB nor outside this MGB division (i.e., in gradient 2). We proceeded to test our final  
188 hypothesis, stating that a task-dependent modulation in the left vMGB correlates with the speech  
189 recognition scores across participants. As expected, there was a significant correlation between the  
190 *Speech vs Speaker* contrast and mean percent correct speech recognition scores across participants in  
191 the vMGB [MNI coordinate: (-11, -28, -5); SVC for vMGB  $p = 0.04$  FWE,  $T = 2.97$ ,  $r = 0.46$  using  
192 Fisher's T to r transform (Fisher, 1915); parameter estimate ( $\beta$ ) and 90% CI 0.82 [0.36, 1.27]; Figure 5  
193 and 6]. In exploratory analyses we tested the correlation between the task-dependent modulation and  
194 the mean correct speech recognition scores across participants in the other left MGB subsection (i.e.,  
195 gradient 2). There was no statistically significant effect [gradient 2: (-12, -28, -5),  $p = 0.223$  FWE,  
196  $T = 2.24$ ,  $\beta$  and 90% CI 1.03 [0.22, 1.83]]. In addition, the results were specific to the correlation with  
197 the *Speech vs Speaker* contrast. In a control analysis, we tested whether the contrast *Speech vs Speaker*  
198 correlated with the mean percent correct *speaker* recognition scores across participants, and found no  
199 suprathreshold voxels in vMGB (nor in gradient 2) even at a lenient statistical threshold (uncorrected  
200  $p < 0.05$ ).

201

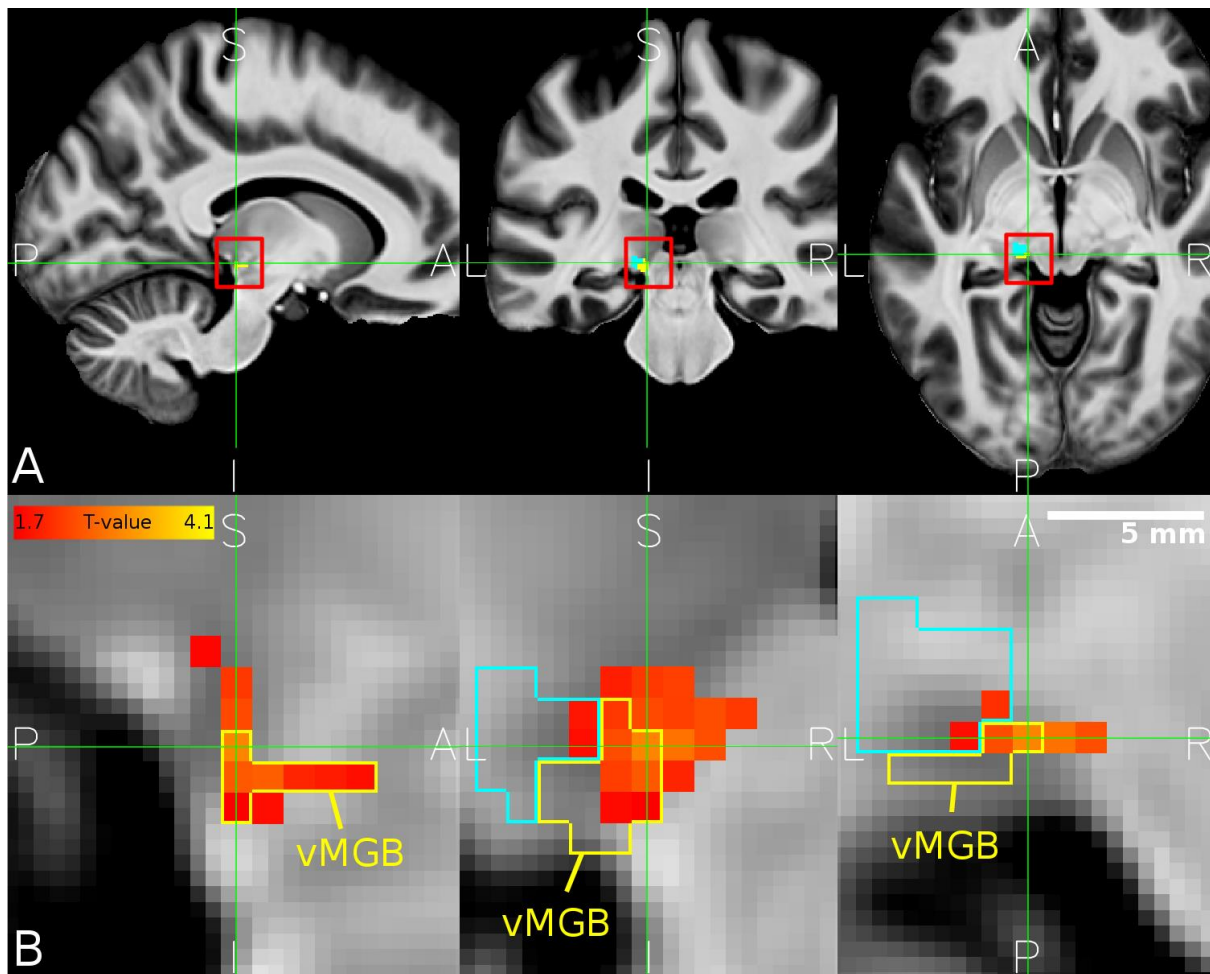

202

203 **Figure 5. Overlap between MGB divisions and performance-related task-dependent modulation.** A. The mean structural  
204 image across participants ( $n = 33$ ) in MNI space. The red squares denote the approximate location of the left MGB and  
205 encompass the zoomed in view in B. B. Overlap of correlation between *Speech vs Speaker* contrast and the mean percent  
206 correct in the speech task (hot colour code) with the left vMGB (yellow). The tonotopic gradient 2 is shown in cyan. Panels  
207 correspond to sagittal, coronal, and axial slices (P: posterior, A: anterior, S: superior, I: inferior, L: left, R: right). Crosshairs point  
208 to the significant voxel using SVC in the vMGB mask (MNI coordinate -11, -28, -5).

209

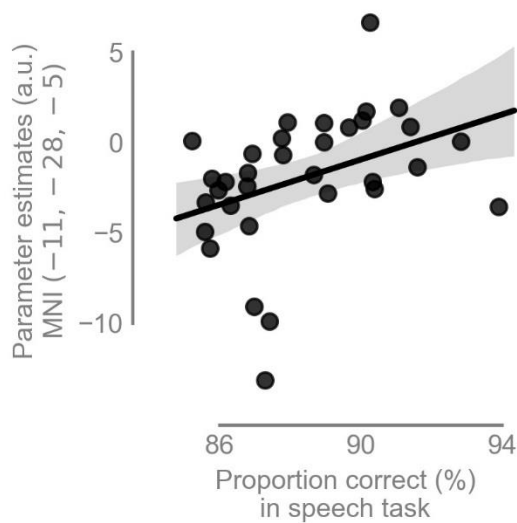

210

211 **Figure 6.** Task dependent modulation of left vMGB correlates with proportion correct responses in the speech task  
212 over participants ( $n = 33$ ): the better the behavioral score in the speech task, the stronger the BOLD response in  
213 left vMGB (maximum statistic at MNI coordinate  $[-11, -28, -5]$ ). The line represents the best fit with 97%  
214 bootstrapped confidence interval (gray shaded region).

## 215 Discussion

216 Using ultra-high field fMRI we here showed that the left auditory first-order sensory thalamus – the left  
217 ventral subdivision of the MGB (vMGB) – is involved in speech recognition. The vMGB is the primary  
218 sensory pathway nucleus of the auditory thalamus and transmits input to the cerebral cortex (Winer,  
219 1984, Anderson et al., 2007a, Bartlett et al., 2011, Bordi and LeDoux, 1994, Calford, 1983, Moerel et al.,  
220 2015). The present results imply that, when decoding speech, higher order cortical areas modify  
221 representations of the sensory input in the primary sensory thalamus and that such modification is  
222 relevant for speech recognition abilities. These results are a further indication that speech recognition  
223 might only be fully understood if dynamic cortico-thalamic interactions are taken into account  
224 (Klostermann, 2013, Kriegstein et al., 2008).

225 We localized the vMGB based on its tonotopic organization and location relative to other MGB divisions.  
226 The tonotopic organization of the ventral MGB has been observed in many species with the use of  
227 invasive techniques (Winer, 1984, Anderson et al., 2007a, Bartlett et al., 2011, Bordi and LeDoux, 1994,  
228 Calford, 1983) and non-invasively in six human participants using ultra-high field fMRI (Moerel et al.,  
229 2015). Similar to Moerel et al. (2015) we here also identified two tonotopic gradients. Moerel et al.  
230 (2015) attributed the ventral gradient to the ventral MGB, and the other gradient cautiously to the

231 tonotopically organized lateral posterior thalamic nucleus (Pol), which is part of the non-lemniscal  
232 system (Jones, 1985). The Pol is also tonotopically organized with sharp tuning curves similar to the  
233 vMGB (Imig and Morel, 1985). Gradient 2 in our study is, however, larger than gradient 1. Thus, gradient  
234 2 might also represent a composite of several nuclei that are in close proximity to the MGB (Bartlett and  
235 Wang, 2011) such as the Pol and potentially the suprageniculate, which has a preference for high  
236 frequencies (Bordi and LeDoux, 1994) (for a detailed thalamic atlas see Morel et al., 1997). Furthermore,  
237 the weak tonotopy of the dMGB or mMGB might also contribute to gradient 2. Another interpretation of  
238 the two tonotopic gradients is that the vMGB in humans might include two tonotopic maps, i.e., that  
239 frequency gradient 1 and 2 are both part of the vMGB. Two tonotopic gradients have been found in the  
240 rat vMGB (Shiramatsu et al., 2016), but not consistently in other species (Hackett et al., 2011, Horie et  
241 al., 2013, Tsukano et al., 2017). The volume of the two gradients, however, speaks against the possibility  
242 of two tonotopic maps in human vMGB. That is, the two gradients make up already ca. 100 mm<sup>3</sup> and  
243 reported whole MGB volumes based on characterization in post-mortem human brains are between ca.  
244 40-120 mm<sup>3</sup> (Rademacher et al., 2002, Moro et al., 2015). Thus while gradient 1 can be clearly attributed  
245 to the vMGB, due to its tonotopic gradient and ventral location, the nature of the second frequency  
246 gradient remains an open question.

247 Based on previous findings (von Kriegstein et al., 2008; Diaz et al., 2012), we expected significant  
248 responses for the categorical Speech vs Speaker contrast in vMGB. The lack of a significant main effect  
249 of task (Speech vs Speaker) in the vMGB was surprising, as this categorical task-effect was observed in  
250 three previous experiments in participants with typical development (von Kriegstein et al., 2008, Díaz et  
251 al., 2012).

252 There are three potential explanations. First, the speaker task was more difficult to perform (indicated  
253 by the lower behavioral score during the speaker vs. speech task and subjective reports of the  
254 participants), which may have led to higher BOLD responses for the more difficult task. However, this  
255 explanation is unlikely as previous studies with matched performance across tasks (Díaz et al., 2012, von  
256 Kriegstein et al., 2008 experiment 2 ) and also studies where the control task was more difficult than the  
257 speech task (von Kriegstein et al., 2008 experiment 1 ) have found a task-dependent MGB modulation  
258 for the speech task.

259 Second, we employed a liberal threshold in choosing participants based on their reading speed and  
260 comprehension scores (lower fourth of the mean and higher, i.e., 26%-100%). Participants who scored  
261 lower on this test might also show a lower task-dependent modulation of the MGB (see see Díaz et al.,

262 2018). However, we find this explanation unlikely as those participants with lower reading score showed  
263 a broad (low to high) BOLD-response spectrum (Supplementary Figure S2), and in the previous study  
264 (Díaz et al., 2018) a correlation between MGB modulation and reading speed and comprehension scores  
265 has been found only in participants with developmental dyslexia, but not in neurotypical controls.

266 A third explanation is that we used unmanipulated natural voices from different speakers. In the  
267 previous studies different speaker voices were synthesized from one original voice to differ only in two  
268 key voice-identity parameters, i.e., the acoustic effect of the vocal tract length and the fundamental  
269 frequency ( $f_0$ ) (von Kriegstein et al., 2008, Díaz et al., 2012, Gaudrain et al., 2009). Vocal tract length and  
270  $f_0$  are relatively stable acoustic cues that do not vary greatly over time in contrast to the highly dynamic  
271 cues (e.g., formant transitions, voice onset times, stops, Kent et al., 1992) that are most important for  
272 signaling phonemes and are used for speech recognition. However, dynamic cues, such as pitch  
273 periodicity, segmental timings, and prosody can also be used for speaker identification (Benesty et al.,  
274 2007). In the present experiment, which included natural voices, participants might have also used fast  
275 changing cues for speaker identity recognition, particularly because the task was difficult. Since dynamic  
276 cues are essential for speech recognition, using dynamic cues in a speaker task would render the two  
277 tasks less different. Thus, MGB modulation might also have played a role in performing the speaker task.  
278 However, the potential use of such cues did not seem to yield a behavioral benefit, as there was no  
279 correlation between the amount of task-dependent modulation and performance in the speaker task  
280 across participants.

281 The localization of the correlation between the speech vs speaker contrast and performance in the  
282 speech task to the vMGB confirmed our hypothesis that the left first-order thalamic nucleus – vMGB – is  
283 involved in speech recognition. The results can be explained neither by differences in stimulus input in  
284 the two conditions, as the same stimuli were heard in both tasks, nor by a correlation with general  
285 better task performance, as there was no correlation with the speaker task. They imply that the  
286 modulation of speech representations at the level of the primary sensory thalamus are important for  
287 speech recognition performance.

288 What kind of mechanism could be represented by the correlation between task-dependent modulation  
289 of the vMGB and speech recognition performance? Experimental and theoretical accounts of brain  
290 function emphasize the importance of an anatomical cortical and subcortical hierarchy that is organized  
291 according to the timescale of complex stimuli in the natural environment (Giraud et al., 2000, Kiebel et  
292 al., 2008, Wang et al., 2008). In brief, it is assumed that levels closer to the sensory input encode faster

293 dynamics of the stimulus than levels further away from the sensory input. In accordance with this view,  
294 the MGB (as well as the visual first-order thalamus [LGN]; Hicks et al., 1983) is tuned to high frequencies  
295 of temporal modulation (ca. 16 Hz in human MGB;Giraud et al., 2000) in relation to their associated  
296 primary sensory cortical areas (Giraud et al., 2000, Wang et al., 2008, Foster et al., 1985). For humans,  
297 the optimized encoding of relatively fast dynamics; e.g., at the phoneme level, is critical for speech  
298 recognition and communication (Shannon et al., 1995a, Tallal et al., 1996, Tallal and Piercy, 1975). Many  
299 important speech components like formant transitions, voice onset times, or stops are on very fast time  
300 scales of 100 ms or less (Hayward, 2000). Additionally, the sound envelope described by relatively fast  
301 temporal modulations (1-10 Hz in quiet environments, 10-50 Hz in noisy environments) is important for  
302 speech recognition (Elliott and Theunissen, 2009, Shannon et al., 1995b). The Bayesian brain hypothesis  
303 proposes that the brain uses internal dynamic models of its environment to predict the trajectory of the  
304 sensory input hypothesis (Knill and Pouget, 2004, Friston and Kiebel, 2009, Friston, 2005, Kiebel et al.,  
305 2008). In accordance with this hypothesis, we have previously suggested that slower dynamics encoded  
306 by auditory cortical areas (Giraud et al., 2000, Wang et al., 2008) provide predictions about input  
307 arriving at lower levels of the temporal-anatomic hierarchy (Kiebel et al., 2008, von Kriegstein et al.,  
308 2008). In this view, these dynamic predictions modulate the response properties of the first-order  
309 sensory thalamus to optimize the early stages of speech recognition. For example, in non-human  
310 animals cortico-thalamic projections outnumber thalamo-cortical projections (reviewed in Ojima and  
311 Rouiller, 2011), and alter the response properties of thalamic neurons (Andolina et al., 2007, Cudeiro  
312 and Sillito, 2006, Ergenzinger et al., 1998, Ghazanfar and Nicolelis, 2001, Sillito et al., 2006 [review] ,  
313 Wang et al., 2018, Sillito et al., 1994, Krupa et al., 1999). In speech processing such a mechanism might  
314 be especially useful as the signal includes both rapid dynamics, and is predictable (e.g., due to co-  
315 articulation or learned statistical regularities in words Saffran, 2003). Furthermore, speech needs to be  
316 computed online often under suboptimal listening conditions. Building up accurate predictions within an  
317 internal generative model about fast sensory dynamics would result in more efficient processing when  
318 the perceptual system is confronted with taxing conditions such as fast stimulus presentation rates or  
319 background noise. We speculate that the correlation between speech task performance and task-  
320 dependent vMGB modulation might be a result of feedback from cerebral cortex areas. Feedback may  
321 emanate directly from auditory primary or association cortices, or indirectly via other structures such as  
322 the reticular nucleus with its inhibitory connections to the MGB (Rouiller and de Ribaupierre, 1985).  
323 Feedback cortico-thalamic projections from layer 6 in A1 to the vMGB, but also from association cortices

324 (Tschentscher et al., 2018), may modulate information ascending through the lemniscal pathway, rather  
325 than convey information to the ventral division (Lee, 2013, Llano and Sherman, 2001).

326 Although most of speech and language research focuses on cerebral cortex structures, investigating  
327 subcortical sensory contributions to speech perception is paramount to the development of a  
328 mechanistic understanding of how the human brain accomplishes speech recognition. The present study  
329 brings us a decisive step further in this direction by suggesting that the task-dependent modulation of  
330 the ventral subdivision of the medial geniculate body – the primary sensory auditory thalamus – is an  
331 important and specific contributor when we want to understand what is said.

## 332 **Materials and Methods**

### 333 **Participants**

334 The Ethics committee of the Medical Faculty, University of Leipzig, Germany approved the study. We  
335 recruited 33 participants using the database of the Max Planck Institute for Human Cognitive and Brain  
336 Sciences, Leipzig, Germany. The participants were right handed (as assessed by the Edinburgh  
337 Handedness Inventory; Oldfield, 1971), native German-speakers, had a mean age and standard deviation  
338 (SD) of  $24.9 \pm 2.5$  years, and included 23 females. Participants provided written informed consent. None  
339 of the participants reported a history of psychiatric or neurological disorders, hearing difficulties, or  
340 current use of psychoactive medications. Normal hearing abilities were confirmed with pure tone  
341 audiometry (250 Hz to 8000 Hz) with a threshold equal to and below 25 dB (Madsen Micromate 304, GN  
342 Otometrics, Denmark). To exclude possible undiagnosed dyslexics, we tested the participant's reading  
343 speed and reading comprehension using the German LGVT: 6-12 test (Schneider et al., 2007). The cut-off  
344 for both reading scores were set to those levels mentioned in the test instructions as the "lower average  
345 and above" performance range (i.e., 26% - 100% of the calculated population distribution). None of the  
346 participants performed below the cut-off performance (mean and standard deviation:  $69.9\% \pm 19.5\%$ ,  
347 lowest mean score: 36%). Furthermore, none of the participants exhibited a clinically relevant number  
348 of traits associated with autism spectrum disorder as assessed by the Autism Spectrum Quotient (AQ;  
349 mean and standard deviation:  $16.2 \pm 4.8$ ; cutoff: 32-50; Baron-Cohen et al., 2001). We tested AQ as  
350 autism can be associated with difficulties in speech-in-noise perception (Alcántara et al., 2004, Groen et  
351 al., 2009) and has overlapping symptoms with dyslexia (White et al., 2006). Participants received  
352 monetary compensation for participating in the study.



## 353 Experiments

354 We performed three different functional MRI measurements: the speech experiment (n=33), a MGB  
355 localizer (n=33), and a tonotopy localizer (n = 28, 18 females, age  $24.8 \pm 5.0$  years).

## 356 Stimuli

357 *MGB and Tonotopy localizer.* The stimuli for the MGB localizer and the tonotopy localizer consisted of 84  
358 and 56 natural sounds, respectively, sampled at 16 kHz at 32 bit, and included samples of human  
359 speech, animal cries and tool sounds (these were the same as described in Moerel et al., 2015). The  
360 stimuli had a duration of 1000 ms, were ramped with 10 ms linear slopes, and had equalized root-mean-  
361 square levels.

362 *Speech experiment.* The speech experiment stimuli consisted of 448 vowel-consonant-vowel (VCV)  
363 syllables with an average duration and SD of  $803 \pm 105$  ms. These were spoken by three female and  
364 three male speakers (mean age and SD  $27.7 \pm 3.3$  years) unfamiliar to the participants, and were  
365 recorded with a video camera (Canon Legria HFS10, Canon, Japan) and a Røde NTG-1 Microphone (Røde  
366 Microphones, Silverwater, NSW, Australia) connected to a pre-amplifier (TubeMP Project Series, Applied  
367 Research and Technology, Rochester, NY, USA) in a sound-attenuated room. The sampling rate was 48  
368 kHz at 16 bit. Auditory stimuli were cut and flanked by Hamming windows of 15 ms at the beginning and  
369 end, converted to mono, and root-mean-square equalized using Python 3.6 (Python Software  
370 Foundation, [www.python.org](http://www.python.org)).

## 371 Procedure

372 *MGB and Tonotopy localizer.* For the MGB localizer and the tonotopy localizer, participants listened to  
373 natural sounds (human voices, animal cries, tool sounds; Moerel et al., 2015). The MGB localizer  
374 consisted of one run where 84 natural sound stimuli were presented in random order and had a  
375 duration of 12:50 minutes. The tonotopy localizer consisted of six runs where 56 of the 84 natural sound  
376 stimuli from the MGB localizer were presented. The sounds were randomly chosen before the first run  
377 and the same 56 sounds were played in each run. Each run had a duration of 8:58 minutes. To ensure  
378 listener engagement, in both localizers the participants performed a 1-back task and pushed a button  
379 when two consecutive sounds were the same. This happened on average 5% of the time. Additionally,  
380 5% of the trials contained no sound (null events). Within each run, sounds were randomly jittered at an  
381 interval of 2, 3, or 4 repetition times (TR) and presented in the middle of the silent gap of 1200 ms  
382 (Figure 1A). The MGB localizer was used as an independent functional identifier for the left and right

383 MGB. The resulting masks were then used to constrain the analyses of the tonotopy localizer to these  
384 regions of interest. In turn, the tonotopic regions of the MGB were used as masks in the speech  
385 experiment (see section Functional MRI Data Analysis).

386 *Speech experiment.* In the speech experiment (Figure 1C) participants listened to blocks of auditory VCV  
387 syllables, and were asked to perform two types of tasks: a speech task and a speaker task. In the speech  
388 task, participants reported via button press whether the current syllable was different from the previous  
389 one (1-back task). In the speaker task, participants reported via button press whether the current  
390 speaker was different from the previous one. Speakers within a block were either all male or all female.  
391 This was necessary to avoid that participants performed a gender discrimination task on some trials and  
392 a speaker identity task on other trials. Task instructions were presented for two seconds prior to each  
393 block and consisted of white written words on a black background (German words “Silbe” for syllable,  
394 and “Person” for person). After the instruction, the block of syllables started (Figure 1B). Each block  
395 contained 14 stimuli. Each stimulus presentation was followed by 400 ms of silence. Within one block  
396 both syllables and speakers changed six or seven times. The average length of a block and SD was  $17.0 \pm$   
397  $0.9$  seconds. Counterbalancing of the stimulus material for the two tasks was achieved by presenting  
398 each block twice: once with the instruction to perform the speech task and once with the instruction to  
399 perform the speaker task. Besides the factor “task”, the experiment included another factor. That is,  
400 blocks had either only vowel or only consonant changes. While this factor is included in the analysis, it is  
401 irrelevant for addressing the current research question.

402 The experiment was divided into five runs with a duration of 8:30 minutes per run. Each of the four  
403 condition blocks (speech vowel change, speaker vowel change, speech consonant change, speaker  
404 consonant change) were presented six times in pseudo-randomized order. The last stimulus  
405 presentation in the run was followed by 30 s of no stimulation. Participants were allowed to rest for one  
406 minute between runs. To familiarize participants with speakers’ voices and to ensure they understood  
407 the task, they performed two initial training runs outside the MRI-scanner: one run for speaker  
408 familiarization, and one for experiment familiarization (for details refer to the Participant Training  
409 section of the Supplementary Information).

410 The experiments were programmed and presented using Presentation (v17.1, NeuroBehavioral Systems,  
411 Berkley, CA, USA) in Windows XP and delivered through an MrConfon amplifier and earbuds linked to  
412 the transducers via air tubes (manufactured 2008, MrConfon GmbH, Magdeburg, Germany).

## 413 **Data Acquisition and Processing**

414 MRI data were acquired using a Siemens Magnetom 7 T scanner (Siemens AG, Erlangen, Germany) with  
415 a Nova 32-channel head coil. Functional MRI data were acquired using echo planar imaging (EPI)  
416 sequences. We used a field of view (FoV) of 792 mm and partial coverage with 28 slices. This volume  
417 was oriented obliquely such that the slices encompassed the inferior colliculi (IC), the MGB and the  
418 superior temporal gyrus, running in parallel to the latter (Figure S3).

419 The MGB and tonotopy localizers had the following acquisition parameters: TR = 2800 ms (acquisition  
420 time TA = 1600 ms, silent gap: 1200 ms), TE = 22 ms, flip angle 65°, GRAPPA (Griswold et al., 2002) with  
421 acceleration factor 2, 33% phase oversampling, matrix size 120 x 120, FoV 792 mm x 792 mm, phase  
422 partial Fourier 6/8, voxel size (1.1 mm)<sup>3</sup>, interleaved acquisition, anterior to posterior phase-encode  
423 direction. We employed a clustered EPI technique allowing for stimulus presentations in quiet in a fast-  
424 event related design. Stimuli were presented during the silent gap. For the MGB localizer we acquired  
425 one run of 275 volumes (13:06 minutes). For the tonotopy localizer we acquired 187 volumes (9:01  
426 minutes) per run with a total of six runs.

427 For the speech experiment, acquisition parameters were the same as for the localizers, with the  
428 exception of a shorter TR (1600 ms) due to continuous scanning (i.e., no silent gap), 320 volumes per  
429 run, and total length of acquisition per run of 8:30 minutes. Five runs were recorded for each  
430 participant. The acquisition parameters were similar to the protocol described by (Moerel et al., 2015),  
431 with the exception of a longer echo time<sup>3</sup> and phase oversampling which eschewed front-back wrapping  
432 artifacts. A sample EPI is shown in Figure S4. The difference in echo time between our sequence and the  
433 one in Moerel et al. (2015) may have resulted in a lower signal-to-noise ratio in subcortical structures.  
434 However, as the MGB has a T2\* value of ~33 ms the different echo times of 19 ms (our sequence) and  
435 22 ms (Moerel et al., 2015) had little to no effect on the signal-to-noise ratio (Hollander et al., 2017).

436 During functional MRI data acquisition we also acquired physiological values (heart rate, and respiration  
437 rate) using a BIOPAC MP150 system (BIOPAC Systems Inc., Goleta, CA, USA). Structural images were  
438 recorded using an MP2RAGE (Marques et al., 2010) T1 protocol: 700 μm isotropic resolution, TE =  
439 2.45ms, TR = 5000 ms, TI1 = 900 ms, TI2 = 2750 ms, flip angle 1 = 5°, flip angle 2 = 3°, FoV 224 mm × 224  
440 mm, GRAPPA acceleration factor 2, duration 10:57 min. More details on the sequence protocols can be  
441 found in the Supplementary Information (Section 'Imaging Sequence Protocols').

## 442 Behavioral Data Analysis

443 Button presses were modeled using a binomial logistic regression which predicts the probability of  
444 correct button presses based on four independent variables (speech task, vowel change; speech task,  
445 consonant change; speaker task, vowel change; speaker, task consonant change) in a Bayesian  
446 framework (McElreath, 2015).

447 To pool over participants and runs we modeled the correlation between intercepts and slopes in a  
448 logistic linear equation. For the model implementation and data analysis, we used PyMC3 (Salvatier et  
449 al., 2016) using a No-U-Turn Sampler (Hoffman and Gelman, 2011) with three parallel chains. Per chain  
450 we had 20,000 samples with 5,000 of these as warm-up. Only the latter 7,500 were used for posterior  
451 mean and highest posterior density (HPD) interval estimates. For details see the Supplementary  
452 Information (Section 'Statistical AnalysisError! Reference source not found. of Behavioral Data'). The  
453 difference in percent correct button presses between the speech and speaker task was calculated using  
454 the posterior densities averaged over consonant and vowel changes. The resulting distribution was  
455 averaged and the 97% HPD was calculated. If the 97% HPD is very large and/or contains the value zero  
456 then we can infer that there is no difference in responses between these two conditions.

## 457 Functional MRI Data Analysis

### 458 *Preprocessing of MRI data*

459 The limited FoV and a lack of a whole brain EPI measurement resulted in coregistration difficulties of  
460 functional and structural data. As a solution, the origin (participant space coordinate [0, 0, 0]) of all EPI  
461 and MP2RAGE images were manually set to the anterior commissure using SPM 12. Furthermore, to  
462 deal with the noise surrounding the head in MP2RAGE images, these were first segmented using SPM's  
463 new segment function (SPM 12, version 12.6906, Wellcome Trust Centre for Human Neuroimaging, UCL,  
464 UK, <http://www.fil.ion.ucl.ac.uk/spm>) running on Matlab 8.6 (The Mathworks Inc., Natick, MA, USA).  
465 The resulting grey and white matter segmentations were summed and binarized to remove voxels that  
466 contain air, scalp, skull and cerebrospinal fluid from structural images using the ImCalc function of SPM.

467 A template of all participants was created with ANTs (Avants et al., 2009) using the participants'  
468 MP2RAGE images, which was then registered to the MNI space using the same software package and  
469 the MNI152 (0.5 mm)<sup>3</sup> voxel size template provided by FSL 5.0.8 (Smith et al., 2004). All MP2RAGE  
470 images were preprocessed with Freesurfer (Fischl et al., 2002, Fischl et al., 2004, Han and Fischl, 2007)

471 using the recon-all command to obtain boundaries between grey and white matter, which were later  
472 used in the functional to structural registration step.

473 The rest of the analysis was coded in nipy (Gorgolewski et al., 2011). A graphical overview of the  
474 nipy pipeline can be found in the Supplementary Information (Figure S5). Head motion and  
475 susceptibility distortion by movement interaction of functional runs were corrected using the Realign  
476 and Unwarp method (Andersson et al., 2001) in SPM 12 after which outlier runs were detected using  
477 ArtifactDetect<sup>1</sup> (composite threshold of translation and rotation: 1; intensity Z-threshold: 3; global  
478 threshold: 8). Coregistration matrices for realigned functional runs per participant were computed  
479 based on each participant's structural image using Freesurfer's BBregister function (register mean EPI  
480 image to T1, option `'-init-header'` was specified in order to preserve the origin of the manual  
481 alignment of structural and functional data). Warping using coregistration matrices (after conversion to  
482 ITK coordinate system) and resampling to 1 mm isovoxel was performed using ANTs. Before model  
483 creation we smoothed the data in SPM12 using a 1 mm kernel at full-width half-maximum.

#### 484 *Physiological data*

485 Physiological data (heart rate and respiration rate) were processed by the PhysIO Toolbox (Kasper et al.,  
486 2017) to obtain Fourier expansions of each, in order to enter these into the design matrix (see statistical  
487 analyses sections below).

#### 488 *Statistical analysis of speech experiment*

489 Models were set up in SPM using the native space data for each participant. The design matrix included  
490 three cardiac and four respiratory regressors, six realignment parameters, and a variable number of  
491 outlier regressors from the ArtifactDetect step, depending on how many outliers were found in each  
492 run. These regressors of no interest were also used in the models of the other two experiments (MGB  
493 and tonotopy localizer). Since participants provided a response only for the target stimulus changes and  
494 not for each stimulus presentation, we modeled these to eschew a potential sensory-motor confound as  
495 0.5 for hit, -0.5 for miss and 0.0 for everything else. If more than one syllable presentation took place  
496 within one volume acquisition, the values within this volume were averaged. The speech experiment  
497 had a total of five modeled conditions, which were convolved with the hemodynamic response function  
498 (HRF): speech task/vowel change, speech task/consonant change, speaker task/vowel change, speaker  
499 task/consonant change, and task instruction. Parameter estimates were computed for the contrast

---

<sup>1</sup> [https://www.nitrc.org/projects/artifact\\_detect/](https://www.nitrc.org/projects/artifact_detect/)

500 *Speech vs Speaker* at the first level using restricted maximum likelihood (REML) as implemented in SPM  
501 12.

502 After estimation, the contrasts were registered to the MNI structural template of all participants using a  
503 two-step registration in ANTs (see also Figure S5). First, a quick registration was performed on the whole  
504 head using rigid, affine and diffeomorphic (using Symmetric Normalization: SyN) transformations and  
505 the mutual information similarity metric. Second, the high quality registration was confined to a  
506 rectangular prism mask encompassing the left and right MGB, and IC only. This step used affine and SyN  
507 transformations and mean squares and neighborhood cross correlation similarity measures,  
508 respectively. We performed the registration to MNI space for all experiments by linearly interpolating  
509 the contrast images using the composite transforms from the high quality registration.

510 We used a random effects (RFX) analysis to compute the *Speech vs Speaker* contrast across participants  
511 to test our first hypothesis that the MGB response is modulated by this contrast. To do this we took the  
512 first level contrasts across participants and entered them into an RFX model to be estimated using  
513 REML. Based on the results of previous experiments (Díaz et al., 2012, von Kriegstein et al., 2008), we  
514 expected a result for the categorical *Speech vs Speaker* contrast in the left and right MGB. Our second  
515 hypothesis was that the proportion of correct button presses in the speech task correlates with the  
516 responses elicited by the *Speech vs Speaker* contrast over participants in the left MGB only (von  
517 Kriegstein et al., 2008, Díaz et al., 2012). We thus computed the RFX correlation between the *Speech vs*  
518 *Speaker* contrast and the proportion of correct button presses in the *Speech* task across participants.  
519 This was implemented using the behavioral percent correct scores for the speech task as a covariate of  
520 interest for each participant in the SPM RFX model.

### 521 *Statistical analysis of the MGB localizer*

522 For the MGB localizer we used a stick function convolved with the HRF to model each presented sound.  
523 Null events were not modeled, as well as repeated sounds, to avoid a sensory-motor confound through  
524 the button-press. The data were modeled according to Perrachione and Ghosh (2013) where repetition  
525 (TR = 2.8 s) and acquisition times (TA = 1.6 s) were modeled separately. The contrast *Sound vs Silence*  
526 was computed for each participant. The inference across participants was modeled using the first level  
527 contrasts in a second-level RFX analysis for the group. Significant voxels (see Section Masks below) in the  
528 left and right MGB found in the RFX analysis for the contrast *Sound vs Silence* were used as a mask for  
529 the tonotopy localizer.

### 530 *Statistical analysis of the tonotopy localizer*

531 For the tonotopy localizer we followed a similar approach as Moerel et al. (2015). The sounds were first  
532 processed through the NSL toolbox (Chi et al., 2005) which mimics the spectral transformation of sounds  
533 passing through the cochlea to the midbrain. This frequency representation includes a bank of 128  
534 overlapping bandpass filters equally spaced on a log frequency axis (180-7040 Hz; range 5.3 octaves).  
535 The resulting spectrograms were averaged over time. To reduce overfitting we divided the tonotopic  
536 axis into 12 equal bandwidths in octaves and averaged the model's output within these regions. The  
537 MrConfon headphones guarantee a linear frequency response up to 4 kHz, thus only the first 10 bins  
538 were used in the analysis, which resulted in 10 frequency bins for each sound file. The frequency model  
539 consisted of a vector of values corresponding to the frequency representations per sound. Since each  
540 sound had a frequency representation the final model is a matrix  $W = [S \times F]$ , where  $S$  is the number  
541 of sounds and  $F$  the number of features per sound. The predictors were z-scored across bins since low  
542 frequencies have more energy and would thus be more strongly represented compared to high  
543 frequencies (Moerel et al., 2015). The matrix was convolved with the hemodynamic response function  
544 and its components (i.e., the 10 frequency bins) were used as regressors of interest in the design matrix  
545 of SPM. In addition, we included the same regressors of no-interest as in the design matrix for the  
546 speech experiment (i.e., six respiratory regressors, six realignment parameters, and a variable number of  
547 outlier regressors from the ArtifactDetect step, depending on how many outliers were found).  
548 Parameter estimates were calculated for each frequency bin at the first level in native space.

### 549 *Masks*

550 MGB localizer: We created masks using all voxels from the second level MGB localizer analysis for the  
551 contrast *Sound vs Silence* (family-wise error [FWE] corrected  $p < 0.001$ ) constrained within a  $r = 5$  mm  
552 sphere centered at the voxel with the statistical maximum in the left and right MGB. We chose such a  
553 stringent p-value due to the strong effect and the multitude of above threshold voxels found within and  
554 around the left and right MGB. This procedure excluded all voxels which were clearly too far away from  
555 the structural boundaries of the MGB as seen in the MP2RAGE MNI template, yet still within the cluster,  
556 to be considered part of the MGB. These masks were inverse transformed per participant from MNI  
557 space to participant space using ANTs. Above threshold voxels (uncorrected  $p < 0.05$ ) within the  
558 transformed masks were extracted, for each participant, from the MGB localizer *Sound vs Silence*  
559 contrast. These masks were then used to define each participant's tonotopy with the tonotopy localizer.

560 Tonotopy localizer: Each voxel within each participant's left and right MGB localizer mask was labeled  
561 according to the frequency bin to which it responded strongest, i.e., which had the highest parameter  
562 estimate (Moerel et al., 2015). Thus, voxels would have values from 1-10 corresponding to the  
563 frequency bin that they best represented. This resulted in a map of frequency distributions from low to  
564 high frequencies in the left and right MGB for each participant. To create masks at the group level, these  
565 tonotopic maps were registered to MNI space using ANTs and averaged across participants.

566 To evaluate the tonotopic representations in the MGB in a similar way as Moerel et al. (2015), we  
567 visually inspected the direction which showed the strongest tonotopy. This was a dorsal-lateral to  
568 ventral-medial gradient that was most visible in a sagittal view. We thus rotated and resliced the  
569 individual maps around the z-axis by 90°, which placed the sagittal view in the x-y plane. In this plane we  
570 calculated gradient directions in 10 adjacent slices, ensuring a representative coverage of the tonotopic  
571 pattern. A cut at 90° captured both low and high frequency areas. Histograms in 5° steps were  
572 calculated for each slice. The histograms of the gradients were then averaged first over slices per  
573 participant, followed by an average over participants. Based on the atlas by (Morel et al., 1997) and  
574 findings of MGB subdivision in awake primates (Bartlett and Wang et al., 2011) we parcellated the  
575 resulting frequency gradients as distinct regions. Voxels that represented the highest frequency were  
576 chosen as the boundary within each slice. Voxels above this boundary corresponded to one region, and  
577 those below this boundary to the other region. The regions were drawn in each slice using ITKSnap (v.  
578 3.6.0; v. 3.6.0; Yushkevich et al., 2006). Volume size and center of mass (COM) for each gradient are  
579 listed in Table 1**Error! Reference source not found.**

### 580 *Significance testing*

581 We used small volume corrections (SVC) to test for significant voxels for *Speech vs Speaker* as well as the  
582 correlation of *Speech vs Speaker* with the behavioral proportion correct scores in the Speech task  
583 (significance defined as  $p < 0.05$  FWE corrected for the region of interest). We tested bilaterally using  
584 the vMGB masks described above for the first hypothesis and left vMGB for the second hypothesis  
585 motivated by findings in previous studies (von Kriegstein et al., 2008, Díaz et al., 2012).

## 586 **References**

587

588



- 589 ALCÁNTARA, J. I., WEISBLATT, E. J. L., MOORE, B. C. J. & BOLTON, P. F. 2004. Speech-in-noise perception  
590 in high-functioning individuals with autism or Asperger's syndrome. *Journal of Child Psychology*  
591 *and Psychiatry*, 45, 1107-1114.
- 592 ANDERSON, L. A., CHRISTIANSON, G. B. & LINDEN, J. F. 2009. Stimulus-Specific Adaptation Occurs in the  
593 Auditory Thalamus. *Journal of Neuroscience*, 29, 7359-7363.
- 594 ANDERSON, L. A. & LINDEN, J. F. 2011. Physiological differences between histologically defined  
595 subdivisions in the mouse auditory thalamus. *Hearing Research*, 274, 48-60.
- 596 ANDERSON, L. A., WALLACE, M. N. & PALMER, A. R. 2007a. Identification of subdivisions in the medial  
597 geniculate body of the guinea pig. *Hearing Research*, 228, 156-167.
- 598 ANDERSON, L. A., WALLACE, M. N. & PALMER, A. R. 2007b. Identification of subdivisions in the medial  
599 geniculate body of the guinea pig. *Hearing Research*, 228, 156-167.
- 600 ANDERSSON, J. L., HUTTON, C., ASHBURNER, J., TURNER, R. & FRISTON, K. 2001. Modeling geometric  
601 deformations in EPI time series. *NeuroImage*, 13, 903-19.
- 602 ANDOLINA, I. M., JONES, H. E., WANG, W. & SILLITO, A. M. 2007. Corticothalamic feedback enhances  
603 stimulus response precision in the visual system. *Proceedings of the National Academy of*  
604 *Sciences*, 104, 1685-1690.
- 605 ANTUNES, F. M. & MALMIERCA, M. S. 2011. Effect of auditory cortex deactivation on stimulus-specific  
606 adaptation in the medial geniculate body. *J Neurosci*, 31, 17306-16.
- 607 AVANTS, B. B., TUSTISON, N. & SONG, G. 2009. Advanced normalization tools (ANTS). *Insight j*, 2, 1-35.
- 608 BARON-COHEN, S., WHEELWRIGHT, S., SKINNER, R., MARTIN, J. & CLUBLEY, E. 2001. The Autism-  
609 Spectrum Quotient (AQ): Evidence from Asperger Syndrome/High-Functioning Autism,  
610 Males and Females, Scientists and Mathematicians. *Journal of Autism and Developmental*  
611 *Disorders*, 31, 5-17.
- 612 BARTLETT, E. L., SADAGOPAN, S. & WANG, X. 2011. Fine frequency tuning in monkey auditory cortex and  
613 thalamus. *Journal of Neurophysiology*, 106, 849-859.
- 614 BARTLETT, E. L. & WANG, X. 2011. Correlation of neural response properties with auditory thalamus  
615 subdivisions in the awake marmoset. *Journal of Neurophysiology*, 105, 2647-2667.
- 616 BENESTY, J., SONDHAI, M. M. & HUANG, Y. 2007. *Springer Handbook of Speech Processing*, Springer Berlin  
617 Heidelberg.
- 618 BORDI, F. & LEDOUX, J. E. 1994. Response properties of single units in areas of rat auditory thalamus  
619 that project to the amygdala. *Experimental Brain Research*, 98, 261-274.
- 620 CALFORD, M. B. 1983. The parcellation of the medial geniculate body of the cat defined by the auditory  
621 response properties of single units. *Journal of Neuroscience*, 3, 2350-2364.
- 622 CAMARILLO, L., LUNA, R., NÁCHER, V. & ROMO, R. 2012. Coding perceptual discrimination in the  
623 somatosensory thalamus. *Proceedings of the National Academy of Sciences*, 109, 21093-21098.
- 624 CHANDRASEKARAN, B., HORNICKE, J., SKOE, E., NICOL, T. & KRAUS, N. 2009. Context-dependent  
625 encoding in the human auditory brainstem relates to hearing speech in noise: Implications for  
626 developmental dyslexia. *Neuron*, 64, 311-319.
- 627 CHANDRASEKARAN, B., KRAUS, N. & WONG, P. C. M. 2011. Human inferior colliculus activity relates to  
628 individual differences in spoken language learning. *Journal of Neurophysiology*, 107, 1325-1336.
- 629 CHI, T., RU, P. & SHAMMA, S. A. 2005. Multiresolution spectrotemporal analysis of complex sounds. *The*  
630 *Journal of the Acoustical Society of America*, 118, 887-906.
- 631 CRUIKSHANK, S. J., KILLACKEY, H. P. & METHERATE, R. 2001. Parvalbumin and calbindin are differentially  
632 distributed within primary and secondary subregions of the mouse auditory forebrain.  
633 *Neuroscience*, 105, 553-569.
- 634 CUDEIRO, J. & SILLITO, A. M. 2006. Looking back: corticothalamic feedback and early visual processing.  
635 *Trends in Neurosciences*, 29, 298-306.

- 636 DÍAZ, B., BLANK, H. & VON KRIEGSTEIN, K. 2018. Task-dependent modulation of the visual sensory  
637 thalamus assists visual-speech recognition. *NeuroImage*, 178, 721-734.
- 638 DÍAZ, B., HINTZ, F., KIEBEL, S. J. & KRIEGSTEIN, K. V. 2012. Dysfunction of the auditory thalamus in  
639 developmental dyslexia. *Proceedings of the National Academy of Sciences*, 109, 13841-13846.
- 640 DUYN, J. H. 2012. The future of ultra-high field MRI and fMRI for study of the human brain. *NeuroImage*,  
641 62, 1241-1248.
- 642 ELLIOTT, T. M. & THEUNISSEN, F. E. 2009. The Modulation Transfer Function for Speech Intelligibility.  
643 *PLOS Computational Biology*, 5, e1000302.
- 644 ERGENZINGER, E. R., GLASIER, M. M., HAHM, J. O. & PONS, T. P. 1998. Cortically induced thalamic  
645 plasticity in the primate somatosensory system. *Nature Neuroscience*, 1, 226-229.
- 646 FISCHL, B., SALAT, D. H., BUSA, E., ALBERT, M., DIETERICH, M., HASELGROVE, C., VAN DER KOUWE, A.,  
647 KILLIANY, R., KENNEDY, D., KLAVENESS, S., MONTILLO, A., MAKRIS, N., ROSEN, B. & DALE, A. M.  
648 2002. Whole Brain Segmentation: Automated Labeling of Neuroanatomical Structures in the  
649 Human Brain. *Neuron*, 33, 341-355.
- 650 FISCHL, B., SALAT, D. H., VAN DER KOUWE, A. J. W., MAKRIS, N., SÉGONNE, F., QUINN, B. T. & DALE, A.  
651 M. 2004. Sequence-independent segmentation of magnetic resonance images. *NeuroImage*, 23,  
652 S69-S84.
- 653 FISHER, R. A. 1915. Frequency Distribution of the Values of the Correlation Coefficient in Samples from  
654 an Indefinitely Large Population. *Biometrika*, 10, 507-521.
- 655 FOSTER, K. H., GASKA, J. P., NAGLER, M. & POLLEN, D. A. 1985. Spatial and temporal frequency  
656 selectivity of neurones in visual cortical areas V1 and V2 of the macaque monkey. *The Journal of*  
657 *Physiology*, 365, 331-363.
- 658 FRIEDERICI, A. D. & GIERHAN, S. M. 2013. The language network. *Current Opinion in Neurobiology*, 23,  
659 250-254.
- 660 FRISTON, K. 2005. A theory of cortical responses. *Philosophical Transactions of the Royal Society of*  
661 *London B: Biological Sciences*, 360, 815-836.
- 662 FRISTON, K. & KIEBEL, S. 2009. Predictive coding under the free-energy principle. *Philosophical*  
663 *Transactions of the Royal Society of London B: Biological Sciences*, 364, 1211-1221.
- 664 GALABURDA, A. M., MENARD, M. T. & ROSEN, G. D. 1994. Evidence for aberrant auditory anatomy in  
665 developmental dyslexia. *Proceedings of the National Academy of Sciences*, 91, 8010-8013.
- 666 GAUDRAIN, E., LI, S., BAN, V. S. & PATTERSON, R. D. 2009. The Role of Glottal Pulse Rate and Vocal Tract  
667 Length in the Perception of Speaker Identity. *Interspeech-2009*, 148-151.
- 668 GHAZANFAR, A. A. & NICOLELIS, M. A. L. 2001. Feature Article: The Structure and Function of Dynamic  
669 Cortical and Thalamic Receptive Fields. *Cerebral Cortex*, 11, 183-193.
- 670 GIRAUD, A.-L., LORENZI, C., ASHBURNER, J., WABLE, J., JOHNSRUDE, I., FRACKOWIAK, R. &  
671 KLEINSCHMIDT, A. 2000. Representation of the Temporal Envelope of Sounds in the Human  
672 Brain. *Journal of Neurophysiology*, 84, 1588-1598.
- 673 GONZALEZ-LIMA, F. & CADA, A. 1994. Cytochrome oxidase activity in the auditory system of the mouse:  
674 A qualitative and quantitative histochemical study. *Neuroscience*, 63, 559-578.
- 675 GORGOLEWSKI, K., BURNS, C. D., MADISON, C., CLARK, D., HALCHENKO, Y. O., WASKOM, M. L. & GHOSH,  
676 S. S. 2011. Nipype: a flexible, lightweight and extensible neuroimaging data processing  
677 framework in python. *Front Neuroinform*, 5, 13.
- 678 GRISWOLD, M. A., JAKOB, P. M., HEIDEMANN, R. M., NITTKA, M., JELLUS, V., WANG, J., KIEFER, B. &  
679 HAASE, A. 2002. Generalized autocalibrating partially parallel acquisitions (GRAPPA). *Magnetic*  
680 *Resonance in Medicine*, 47, 1202-1210.
- 681 GROEN, W. B., VAN ORSOUW, L., HUURNE, N. T., SWINKELS, S., VAN DER GAAG, R.-J., BUITELAAR, J. K. &  
682 ZWIERS, M. P. 2009. Intact Spectral but Abnormal Temporal Processing of Auditory Stimuli in  
683 Autism. *Journal of Autism and Developmental Disorders*, 39, 742-750.

- 684 HACKETT, T. A., BARKAT, T. R., O'BRIEN, B. M. J., HENSCH, T. K. & POLLEY, D. B. 2011. Linking Topography  
685 to Tonotopy in the Mouse Auditory Thalamocortical Circuit. *Journal of Neuroscience*, 31, 2983-  
686 2995.
- 687 HACKETT, T. A., STEPNIIEWSKA, I. & KAAS, J. H. 1998. Thalamocortical connections of the parabelt  
688 auditory cortex in macaque monkeys. *The Journal of Comparative Neurology*, 400, 271-286.
- 689 HAN, X. & FISCHL, B. 2007. Atlas Renormalization for Improved Brain MR Image Segmentation Across  
690 Scanner Platforms. *IEEE Transactions on Medical Imaging*, 26, 479-486.
- 691 HAYNES, J. D., DEICHMANN, R. & REES, G. 2005. Eye-specific effects of binocular rivalry in the human  
692 lateral geniculate nucleus. *Nature*, 438, 496-9.
- 693 HAYWARD, K. 2000. *Experimental phonetics*, Harlow, Eng. ; New York, Longman.
- 694 HICKOK, G. & POEPEL, D. 2007. The cortical organization of speech processing. *Nature Reviews*  
695 *Neuroscience*, 8, 393-402.
- 696 HICKS, T. P., LEE, B. B. & VIDYASAGAR, T. R. 1983. The responses of cells in macaque lateral geniculate  
697 nucleus to sinusoidal gratings. *The Journal of Physiology*, 337, 183-200.
- 698 HOFFMAN, M. D. & GELMAN, A. 2011. The No-U-Turn Sampler: Adaptively Setting Path Lengths in  
699 Hamiltonian Monte Carlo. *arXiv:1111.4246 [cs, stat]*.
- 700 HOLLANDER, G. D., KEUKEN, M. C., ZWAAG, W. V. D., FORSTMANN, B. U. & TRAMPEL, R. 2017.  
701 Comparing functional MRI protocols for small, iron-rich basal ganglia nuclei such as the  
702 subthalamic nucleus at 7 T and 3 T. *Human Brain Mapping*, 38, 3226-3248.
- 703 HORIE, M., TSUKANO, H., HISHIDA, R., TAKEBAYASHI, H. & SHIBUKI, K. 2013. Dual compartments of the  
704 ventral division of the medial geniculate body projecting to the core region of the auditory  
705 cortex in C57BL/6 mice. *Neuroscience Research*, 76, 207-212.
- 706 IMIG, T. J. & MOREL, A. 1985. Tonotopic organization in ventral nucleus of medial geniculate body in the  
707 cat. *Journal of Neurophysiology*, 53, 309-340.
- 708 JONES, E. G. 1985. *The thalamus*, Plenum Press, New York.
- 709 KASPER, L., BOLLMANN, S., DIACONESCU, A. O., HUTTON, C., HEINZLE, J., IGLESIAS, S., HAUSER, T. U.,  
710 SEBOLD, M., MANJALY, Z.-M., PRUESSMANN, K. P. & STEPHAN, K. E. 2017. The PhysIO Toolbox  
711 for Modeling Physiological Noise in fMRI Data. *Journal of Neuroscience Methods*, 276, 56-72.
- 712 KENT, R. D., READ, C. & KENT, R. D. 1992. *The acoustic analysis of speech*, Singular Publishing Group San  
713 Diego.
- 714 KIEBEL, S. J., DAUNIZEAU, J. & FRISTON, K. J. 2008. A Hierarchy of Time-Scales and the Brain. *PLOS*  
715 *Computational Biology*, 4, e1000209.
- 716 KLOSTERMANN, F. 2013. Functional roles of the thalamus for language capacities. *Frontiers in Systems*  
717 *Neuroscience*, 7.
- 718 KNILL, D. C. & POUGET, A. 2004. The Bayesian brain: the role of uncertainty in neural coding and  
719 computation. *Trends in Neurosciences*, 27, 712-719.
- 720 KRIEGSTEIN, K. V., DOGAN, Ö., GRÜTER, M., GIRAUD, A.-L., KELL, C. A., GRÜTER, T., KLEINSCHMIDT, A. &  
721 KIEBEL, S. J. 2008. Simulation of talking faces in the human brain improves auditory speech  
722 recognition. *Proceedings of the National Academy of Sciences*, 105, 6747-6752.
- 723 KRUPA, D. J., GHAZANFAR, A. A. & NICOLELIS, M. A. L. 1999. Immediate thalamic sensory plasticity  
724 depends on corticothalamic feedback. *Proceedings of the National Academy of Sciences*, 96,  
725 8200-8205.
- 726 LEE, C. C. 2013. Thalamic and cortical pathways supporting auditory processing. *Brain and Language*,  
727 126, 22-28.
- 728 LEE, C. C. & SHERMAN, S. M. 2012. Intrinsic modulators of auditory thalamocortical transmission.  
729 *Hearing Research*, 287, 43-50.
- 730 LEE, C. C. & WINER, J. A. 2011. Convergence of thalamic and cortical pathways in cat auditory cortex.  
731 *Hearing Research*, 274, 85-94.

- 732 LLANO, D. A. & SHERMAN, S. M. 2001. Evidence for nonreciprocal organization of the mouse auditory  
733 thalamocortical-corticothalamic projection systems. *Journal of Comparative Neurology*, 507,  
734 1209-1227.
- 735 MALMIERCA, M. S., ANDERSON, L. A. & ANTUNES, F. M. 2015. The cortical modulation of stimulus-  
736 specific adaptation in the auditory midbrain and thalamus: a potential neuronal correlate for  
737 predictive coding. *Frontiers in Systems Neuroscience*, 9.
- 738 MARQUES, J. P., KOBER, T., KRUEGER, G., VAN DER ZWAAG, W., VAN DE MOORTELE, P.-F. & GRUETTER,  
739 R. 2010. MP2RAGE, a self bias-field corrected sequence for improved segmentation and T1-  
740 mapping at high field. *NeuroImage*, 49, 1271-1281.
- 741 MCALONAN, K., CAVANAUGH, J. & WURTZ, R. H. 2008. Guarding the gateway to cortex with attention in  
742 visual thalamus. *Nature*, 456, 391-4.
- 743 MCELREATH, R. 2015. *Statistical Rethinking: A Bayesian Course with Examples in R and Stan* [Online].  
744 [Accessed].
- 745 MOEREL, M., DE MARTINO, F., UĞURBIL, K., YACOUB, E. & FORMISANO, E. 2015. Processing of frequency  
746 and location in human subcortical auditory structures. *Scientific Reports*, 5.
- 747 MOREL, A., MAGNIN, M. & JEANMONOD, D. 1997. Multiarchitectonic and stereotactic atlas of the  
748 human thalamus. *The Journal of Comparative Neurology*, 387, 588-630.
- 749 MOREST, D. K. 1964. The neuronal architecture of the medial geniculate body of the cat. *Journal of*  
750 *Anatomy*, 98, 611-630.1.
- 751 MORO, S. S., KELLY, K. R., MCKETTON, L., GALLIE, B. L. & STEEVES, J. K. E. 2015. Evidence of multisensory  
752 plasticity: Asymmetrical medial geniculate body in people with one eye. *NeuroImage: Clinical*, 9,  
753 513-518.
- 754 MOTHE, L. A. D. L., BLUMELL, S., KAJIKAWA, Y. & HACKETT, T. A. 2006. Thalamic connections of the  
755 auditory cortex in marmoset monkeys: Core and medial belt regions. *Journal of Comparative*  
756 *Neurology*, 496, 72-96.
- 757 MÜLLER-AXT, C., ANWANDER, A. & VON KRIEGSTEIN, K. 2017. Altered Structural Connectivity of the Left  
758 Visual Thalamus in Developmental Dyslexia. *Current Biology*, 27, 3692-3698.e4.
- 759 O'CONNOR, D. H., FUKUI, M. M., PINSK, M. A. & KASTNER, S. 2002. Attention modulates responses in the  
760 human lateral geniculate nucleus. *Nat Neurosci*, 5, 1203-9.
- 761 OHGA, S., TSUKANO, H., HORIE, M., TERASHIMA, H., NISHIO, N., KUBOTA, Y., TAKAHASHI, K., HISHIDA, R.,  
762 TAKEBAYASHI, H. & SHIBUKI, K. 2018. Direct Relay Pathways from Lemniscal Auditory Thalamus  
763 to Secondary Auditory Field in Mice. *Cerebral Cortex*.
- 764 OJIMA, H. & ROUILLER, E. M. 2011. Auditory Cortical Projections to the Medial Geniculate Body. In:  
765 WINER, J. A. & SCHREINER, C. E. (eds.) *The Auditory Cortex*. Boston, MA: Springer US.
- 766 OLDFIELD, R. C. 1971. The assessment and analysis of handedness: the Edinburgh inventory.  
767 *Neuropsychologia*, 9, 97-113.
- 768 PERRACHIONE, T. K. & GHOSH, S. S. 2013. Optimized design and analysis of sparse-sampling fMRI  
769 experiments. *Brain Imaging Methods*, 7, 55.
- 770 RADEMACHER, J., BÜRCEL, U. & ZILLES, K. 2002. Stereotaxic Localization, Intersubject Variability, and  
771 Interhemispheric Differences of the Human Auditory Thalamocortical System. *NeuroImage*, 17,  
772 142-160.
- 773 RAUSCHECKER, J. P. & SCOTT, S. K. 2009. Maps and streams in the auditory cortex: nonhuman primates  
774 illuminate human speech processing. *Nature Neuroscience*, 12, 718-724.
- 775 RODRIGUES-DAGAEFF, C., SIMM, G., DE RIBAUPIERRE, Y., VILLA, A., DE RIBAUPIERRE, F. & ROUILLER, E.  
776 M. 1989. Functional organization of the ventral division of the medial geniculate body of the cat:  
777 Evidence for a rostro-caudal gradient of response properties and cortical projections. *Hearing*  
778 *Research*, 39, 103-125.

- 779 ROUILLER, E. M. & DE RIBAUPIERRE, F. 1985. Origin of afferents to physiologically defined regions of the  
780 medial geniculate body of the cat: ventral and dorsal divisions. *Hearing Research*, 19, 97-114.
- 781 SAALMANN, Y. B. & KASTNER, S. 2011. Cognitive and perceptual functions of the visual thalamus.  
782 *Neuron*, 71, 209-23.
- 783 SAFFRAN, J. R. 2003. Statistical Language Learning: Mechanisms and Constraints. *Current Directions in*  
784 *Psychological Science*, 12, 110-114.
- 785 SALVATIER, J., WIECKI, T. V. & FONNESBECK, C. 2016. Probabilistic programming in Python using PyMC3.  
786 *PeerJ Computer Science*, 2, e55.
- 787 SCHNEIDER, W., ENNEMOSER, M. & SCHLAGMÜLLER, M. 2007. *Lesegeschwindigkeits- und -*  
788 *verständnistest für die Klassen 6 - 12: LGVT 6 - 12*, Hogrefe.
- 789 SHANNON, R. V., ZENG, F.-G., KAMATH, V., WYGONSKI, J. & EKELID, M. 1995a. Speech Recognition with  
790 Primarily Temporal Cues. *Science*, 270, 303-304.
- 791 SHANNON, R. V., ZENG, F.-G., KAMATH, V., WYGONSKI, J. & EKELID, M. 1995b. Speech Recognition with  
792 Primarily Temporal Cues. *Science*, 270, 303-304.
- 793 SHERMAN, S. M. & GUILLERY, R. W. 1998. On the actions that one nerve cell can have on another:  
794 Distinguishing “drivers” from “modulators”. *Proceedings of the National Academy of Sciences*,  
795 95, 7121-7126.
- 796 SHERMAN, S. M. & GUILLERY, R. W. 2006. *Exploring the Thalamus and Its Role in Cortical Function*, MIT  
797 Press.
- 798 SHIRAMATSU, T. I., TAKAHASHI, K., NODA, T., KANZAKI, R., NAKAHARA, H. & TAKAHASHI, H. 2016.  
799 Microelectrode mapping of tonotopic, laminar, and field-specific organization of thalamo-  
800 cortical pathway in rat. *Neuroscience*, 332, 38-52.
- 801 SILLITO, A. M., CUDEIRO, J. & JONES, H. E. 2006. Always returning: feedback and sensory processing in  
802 visual cortex and thalamus. *Trends in Neurosciences*, 29, 307-316.
- 803 SILLITO, A. M., JONES, H. E., GERSTEIN, G. L. & WEST, D. C. 1994. Feature-linked synchronization of  
804 thalamic relay cell firing induced by feedback from the visual cortex. *Nature*, 369, 479-482.
- 805 SMITH, S. M., JENKINSON, M., WOOLRICH, M. W., BECKMANN, C. F., BEHRENS, T. E. J., JOHANSEN-BERG,  
806 H., BANNISTER, P. R., DE LUCA, M., DROBNJAK, I., FLITNEY, D. E., NIAZY, R. K., SAUNDERS, J.,  
807 VICKERS, J., ZHANG, Y., DE STEFANO, N., BRADY, J. M. & MATTHEWS, P. M. 2004. Advances in  
808 functional and structural MR image analysis and implementation as FSL. *NeuroImage*, 23, S208-  
809 S219.
- 810 SQUIRE, L., BERG, D., BLOOM, F. E., DU LAC, S., GHOSH, A. & SPITZER, N. C. 2012. *Fundamental*  
811 *neuroscience*, Academic Press.
- 812 TALLAL, P., MILLER, S. L., BEDI, G., BYMA, G., WANG, X., NAGARAJAN, S. S., SCHREINER, C., JENKINS, W.  
813 M. & MERZENICH, M. M. 1996. Language Comprehension in Language-Learning Impaired  
814 Children Improved with Acoustically Modified Speech. *Science*, 271, 81-84.
- 815 TALLAL, P. & PIERCY, M. 1975. Developmental aphasia: The perception of brief vowels and extended  
816 stop consonants. *Neuropsychologia*, 13, 69-74.
- 817 TSCHENTSCHER, N., RUISINGER, A., BLANK, H., DIAZ, B. & VON KRIEGSTEIN, K. 2018. Reduced structural  
818 connectivity between left auditory thalamus and the motion-sensitive planum temporale in  
819 developmental dyslexia. *arXiv:1811.11658 [q-bio]*.
- 820 TSUKANO, H., HORIE, M., OHGA, S., TAKAHASHI, K., KUBOTA, Y., HISHIDA, R., TAKEBAYASHI, H. &  
821 SHIBUKI, K. 2017. Reconsidering Tonotopic Maps in the Auditory Cortex and Lemniscal Auditory  
822 Thalamus in Mice. *Frontiers in Neural Circuits*, 11.
- 823 VASQUEZ-LOPEZ, S. A., WEISSENBERGER, Y., LOHSE, M., KEATING, P., KING, A. J. & DAHMEN, J. C. 2017.  
824 Thalamic input to auditory cortex is locally heterogeneous but globally tonotopic. *Elife*, 6,  
825 e25141.

- 826 VON KRIEGSTEIN, K., PATTERSON, R. D. & GRIFFITHS, T. D. 2008. Task-dependent modulation of medial  
827 geniculate body is behaviorally relevant for speech recognition. *Curr Biol*, 18, 1855-9.
- 828 WANG, W., ANDOLINA, I. M., LU, Y., JONES, H. E. & SILLITO, A. M. 2018. Focal Gain Control of Thalamic  
829 Visual Receptive Fields by Layer 6 Corticothalamic Feedback. *Cerebral Cortex*, 28, 267-280.
- 830 WANG, X., LU, T., BENDOR, D. & BARTLETT, E. 2008. Neural coding of temporal information in auditory  
831 thalamus and cortex. *Neuroscience*, 154, 294-303.
- 832 WANG, Y., ZHANG, J., ZOU, J., LUO, H. & DING, N. Prior Knowledge Guides Speech Segregation in Human  
833 Auditory Cortex. *Cerebral Cortex*.
- 834 WERNICKE, C. 1874. *Der aphasische Symptomencomplex: Eine psychologische Studie auf anatomischer*  
835 *Basis*, Cohn.
- 836 WHITE, S., FRITH, U., MILNE, E., ROSEN, S., SWETTENHAM, J. & RAMUS, F. 2006. A double dissociation  
837 between sensorimotor impairments and reading disability: A comparison of autistic and dyslexic  
838 children. *Cognitive Neuropsychology*, 23, 748-761.
- 839 WINER, J. A. 1984. The human medial geniculate body. *Hearing Research*, 15, 225-247.
- 840 WINER, J. A., KELLY, J. B. & LARUE, D. T. 1999. Neural architecture of the rat medial geniculate body.  
841 *Hearing Research*, 130, 19-41.
- 842 WINER, J. A., MILLER, L. M., LEE, C. C. & SCHREINER, C. E. 2005. Auditory thalamocortical transformation:  
843 structure and function. *Trends in Neurosciences*, 28, 255-263.
- 844 WINER, J. A. & PRIETO, J. J. 2001. Layer V in cat primary auditory cortex (AI): Cellular architecture and  
845 identification of projection neurons. *Journal of Comparative Neurology*, 434, 379-412.
- 846 YUSHKEVICH, P. A., PIVEN, J., HAZLETT, H. C., SMITH, R. G., HO, S., GEE, J. C. & GERIG, G. 2006. User-  
847 guided 3D active contour segmentation of anatomical structures: Significantly improved  
848 efficiency and reliability. *NeuroImage*, 31, 1116-1128.

849
